# Supplementary material for: Contemporary disengagement from antiretroviral therapy in Khayelitsha, South Africa: A cohort study
Source: PubMed Central journal article supplement (PMC5675399; doi:10.1371/journal.pmed.1002407), 2017-11-07

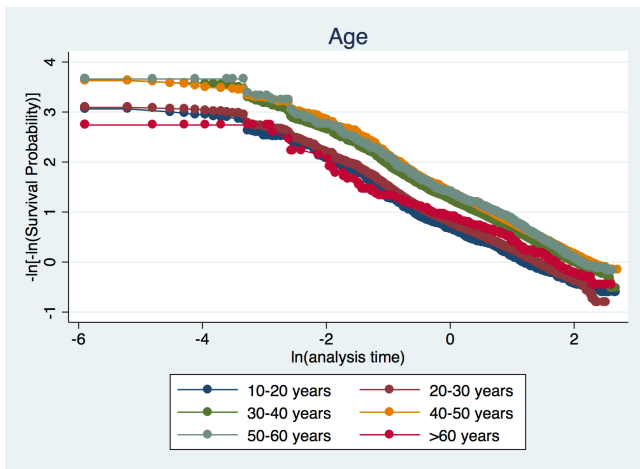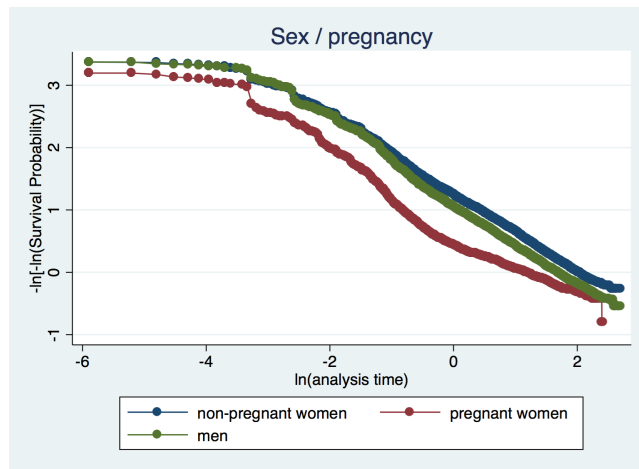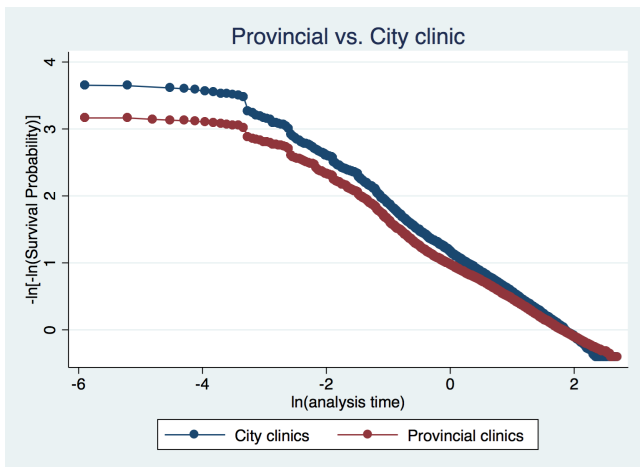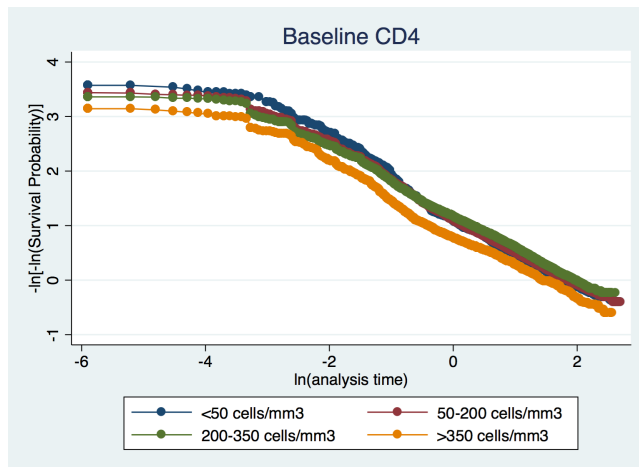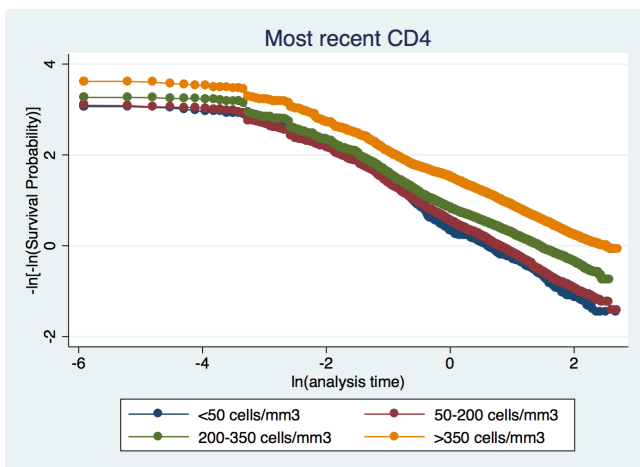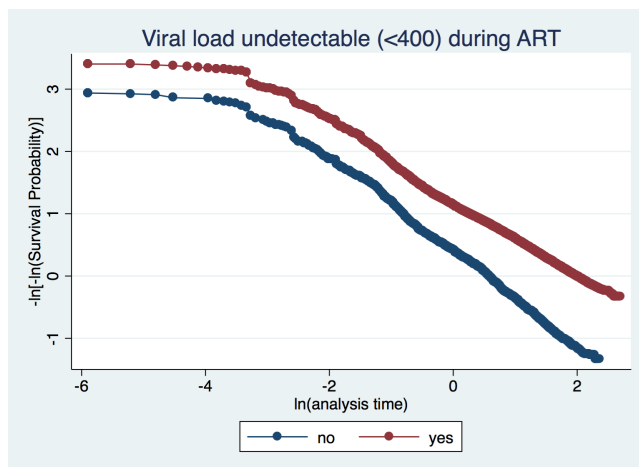

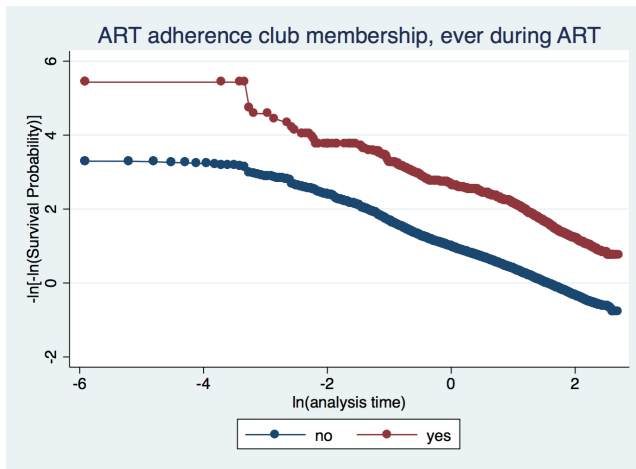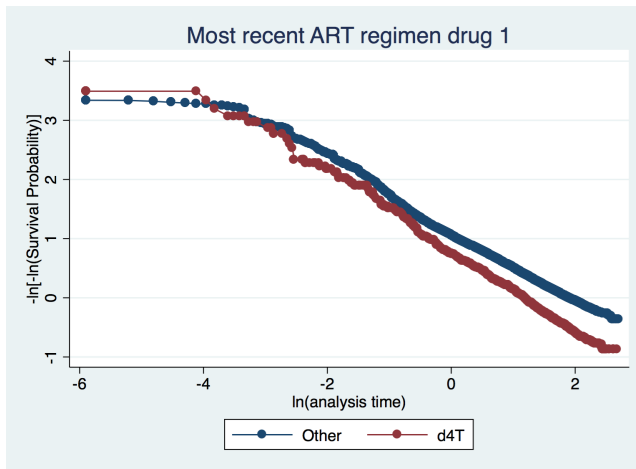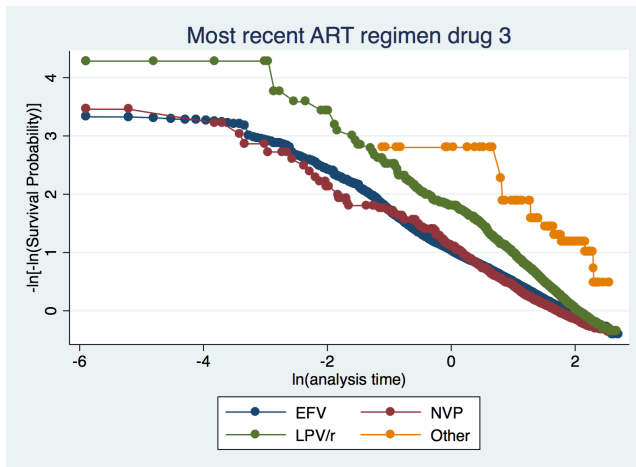

Supplement: pmed.1002407.s006.pdf [file pmed.1002407.s006.pdf]
